# Supplementary material for: Long Noncoding RNA BC032913 as a Novel Therapeutic Target for Colorectal Cancer that Suppresses Metastasis by Upregulating TIMP3
Source: PubMed Central journal article supplement — Mol Ther Nucleic Acids. 2017 Jul 13;8:469–81. doi: 10.1016/j.omtn.2017.07.009 (PMC5545770; doi:10.1016/j.omtn.2017.07.009), 2017-07-13
Supplement: mmc1.pdf [file mmc1.pdf]

OMTN, Volume 8

## **Supplemental Information**

### **Long Noncoding RNA BC032913 as a Novel Therapeutic Target for Colorectal Cancer that Suppresses Metastasis by Upregulating TIMP3**

**Jiabin Lin, Xin Tan, Lin Qiu, Long Huang, Yi Zhou, Zhizhong Pan, Ranyi Liu, Shuai Chen, Rong Geng, Jiangxue Wu, and Wenlin Huang**

## Supplementary Tables

**Table S1. Basic information of the six patients.**

| ID                    | 672    | 758    | 767    | 788    | 800    | 849    |
|-----------------------|--------|--------|--------|--------|--------|--------|
| Gender                | male   | female | male   | male   | male   | female |
| Age                   | 66     | 51     | 58     | 71     | 78     | 54     |
| Pathological type     | adeno  | adeno  | adeno  | adeno  | adeno  | adeno  |
| Tumour location       | colon  | colon  | colon  | colon  | colon  | colon  |
| Tumour stage          | T3N0M1 | T4N2M1 | T3N0M0 | T2N1M1 | T3N0M0 | T3N0M0 |
| Lymph node metastasis | no     | yes    | no     | yes    | no     | no     |
| Metastasis            | liver  | liver  | no     | liver  | no     | no     |
| Survival (0/1)        | 1      | 1      | 0      | 1      | 0      | 0      |
| OS (months)           | 13.5   | 18.7   | 59     | 18.9   | 60.2   | 54.6   |

The lncRNA profile differences between 6 human CRC tissue specimens and their corresponding normal tissues were detected by Human LncRNA Array v2.0 (8×60 K, Arraystar).

**Table S2. A collection of deregulated lncRNAs verified by qRT-PCR in 20 CRC tissues and paired non-cancerous tissues**

| Name            | Chromosome | Regulation | Fold<br>Change | <i>P</i><br>value | Source         |
|-----------------|------------|------------|----------------|-------------------|----------------|
| BC032913        | chr2       | down       | 25.038         | 0.0229            | UCSC_knowngene |
| BC029135        | Chr10      | down       | 25.034         | 0.0008            | misc_RNA       |
| NR_003191       | Chr9       | down       | 5.662          | 0.0001            | RefSeq_NR      |
| ENST00000502715 | Chr4       | up         | 7.145          | 0.0057            | Ensembl        |
| ENST00000418454 | Chr13      | up         | 4.140          | 0.0072            | Ensembl        |
| H19             | Chr11      | up         | 3.722          | 0.0345            | RefSeq_NR      |

**Table S3. Primers used in this study.**

| Gene            | Sequence                                                         | Product size (bp) |
|-----------------|------------------------------------------------------------------|-------------------|
| BC029135        | 5' TAGACAAGGATCGTGCCCCA 3'<br>5' GTCTGTGCCATGAGGGTGTC 3'         | 154               |
| NR_003191       | 5' TTGAAACCAGCACCTTCCCTT 3'<br>5' CGAGAGTTTAGGGCGATCCA 3'        | 176               |
| BC032913        | 5' AGGGCGTGTCTGAGATTGTG 3'<br>5' TAGGAGTTCCACCGACGTGA 3'         | 133               |
| ENST00000502715 | 5' GACCTTCACAATGCCTAGTGACAC 3'<br>5' ACCATGGGTACATTGTAAGGGTAG 3' | 168               |
| ENST00000418454 | 5' CTCTAATTGGGACTCCGAGCCA 3'<br>5' TCAGTGCCATCCTTTTCCCAC 3'      | 167               |
| H19             | 5' TGCTGCACTTTACAACCACTG 3'<br>5' ATGGTGTCTTTGATGTTGGGC 3'       | 101               |
| APC             | 5' AAAATGTCCCTCCGTTCTTATGG 3'<br>5' CTGAAGTTGAGCGTAATACCAGT 3'   | 222               |
| TIMP3           | 5' CATGTGCAGTACATCCATACGG 3'<br>5' CATCATAGACGCGACCTGTCA 3'      | 100               |
| TNFSF10         | 5' CGTGTACTTTACCAACGAGCTGA 3'<br>5' ACGGAGTTGCCACTTGACTTG 3'     | 151               |

|       |                               |     |
|-------|-------------------------------|-----|
| CD44  | 5' CTGCCGCTTTGCAGGTGTA3'      | 109 |
|       | 5' CATTGTGGGCAAGGTGCTATT 3'   |     |
| MMP13 | 5' TCCTGATGTGGGTGAATACAATG 3' | 184 |
|       | 5' GCCATCGTGAAGTCTGGTAAAAT 3' |     |
| MYCL  | 5' AGCGAGGGAGCGGACAT 3'       | 126 |
|       | 5' TGGCACCAGCTCGAATTTCT 3'    |     |
| KISS1 | 5' ACAGGCCAGCAGCTAGAATC 3'    | 237 |
|       | 5' GTAGTTCGGCAGGTCCTTCT 3'    |     |
| NR4A3 | 5' CATAACAGCTCGGAATACACCAC 3' | 130 |
|       | 5' CCCTCCACGAAGGTACTGATG 3'   |     |
| DPP10 | 5' TCCATGCCTGCCCAATTCAT 3'    | 170 |
|       | 5' GCAAGTCAACACAGCACAGG 3'    |     |
| CTNNB | 5' GGTTGCCTTGCTCAACAAAA 3'    | 365 |
|       | 5' TCCCAAGGAGACCTTCCATC 3'    |     |
| GAPDH | 5' CTCCTCCTGTTTCGACAGTCAGC 3' | 113 |
|       | 5' CCCAATACGACCAAATCCGTT 3'   |     |

---
